# Supplementary material for: Metataxonomic Identification of Microorganisms during the Coffee Fermentation Process in Colombian Farms (Cesar Department)
Source: MDPI journal article supplement (doi:10.3390/foods13060839), 2024-03-09
Supplement: s1 [file s1]

## *Supplementary Material*

### **Metataxonomic and Microbial Characterization of the Coffee Fermentation Process in Colombian Farms (Cesar Department)**

**Carmenza E. Góngora<sup>1\*</sup>, Laura Holguín-Sterling<sup>2</sup>, Bertilda Pedraza-Claros<sup>2-3</sup>, Rosangela Perez-Salinas<sup>3</sup>, Aristóteles Ortiz<sup>4</sup>, Lucio Navarro-Escalante<sup>1-5</sup>.**

<sup>1</sup> Department of Entomology. <sup>2</sup>Department of Post Harvesting. <sup>4</sup>Department of Plant Physiology. National Coffee Research Center, Cenicafé. Manizales 170009, Colombia;

carmenza.gongora@cafedecolombia.com (C.E.G.); lhsterling22@gmail.com (L.H.S.); aristoteles.ortiz@cafedecolombia.com (A.O.)

<sup>3</sup> Cienciaudes Research Group, Faculty of Health Science, Universidad de Santander. Valledupar 200004, Colombia; ber.pedraza@mail.udes.edu.co (B.P.C.); ros.perez@mail.udes.edu.co (R.P.S.)

<sup>5</sup> Current position: Department of Molecular Biosciences, University of Texas at Austin, Austin TX 78712; lucio.navarro@austin.utexas.edu; lucio.navarro@austin.utexas.edu (L.N.-E.)

**Supplementary Table S1.** Technical characteristics of the farms from the department of Cesar.

| Farm | Municipality        | Georegistration             |                    | Coffee variety   | Fermentation characteristics |                                                   |
|------|---------------------|-----------------------------|--------------------|------------------|------------------------------|---------------------------------------------------|
|      |                     | Coordinates                 | Altitude (m.a.s.l) |                  | Time (h)                     | Condition                                         |
| F1   | Pueblo Bello        | 10°24.2225'N-73°662268'O    | 1390               | Castillo General | 36                           | Fermentation without water, tiled tank            |
| F2   | Pueblo Bello        | 10°21.6800'N-73°43.2610'O   | 1700               | Castillo General | 36                           | Fermentation without water, tiled tank            |
| F3   | La Paz              | 10°19.1600'N - 72°59.6350'O | 1820               | Castillo General | 20                           | Fermentation without water, plastic tank          |
| F4   | La jagua de Ibirico | 9°31,1220 N-73°10.9080'O    | 1835               | Castillo General | 18                           | Fermentation with water, tiled tank               |
| F5   | Agustín Codazzi     | 9°32.4960'N-73°9.6120'O     | 1492               | Colombia         | 18                           | Fermentation with water, concrete tank            |
| F6   | Agustín Codazzi     | 9°58.6670'N-73°2.8470'O     | 1813               | Colombia         | 42                           | Fermentation without water, tiled tank            |
| F7   | Pueblo Bello        | 10°22.2000'N-73°42.1280'O   | 1588               | Cenicafé 1       | 36                           | Submerged fermentation in plastic tanks with lids |
| F8   | Pueblo Bello        | 10°22.19'N-73°42'16'O       | 1540               | Colombia         | 18                           | Fermentation without water, tiled tank            |
| F9   | Agustín Codazzi     | 10°2.2530'N-73°7.9449'O     | 1261               | Castillo General | 18                           | Fermentation without water, plastic tank          |
| F10  | Agustín Codazzi     | 10°2.2550'N-73°8.3970'O     | 1124               | Colombia         | 18                           | Fermentation with water, concrete tank            |
| F11  | La Paz              | 10°15.9740' N-73°4.7040'O   | 1116               | Colombia         | 36                           | Fermentation with water, concrete tank            |
| F12  | La Paz              | 10°16.2290'N-73°2.8720'O    | 1518               | Castillo General | 14                           | Fermentation with water, concrete tank            |
| F13  | Pueblo Bello        | 10°22.59'N-73°3870'O        | 1162               | Colombia         | 16                           | Fermentation without water, concrete tank         |
| F14  | Pueblo Bello        | 10°235.38'N-73°37'30.761'O  | 1123               | Castillo General | 10                           | Fermentation without water, concrete tank         |
| F15  | La Paz              | 10°20.6400'N-72°57.2930'O   | 1837               | Colombia         | 16                           | Fermentation without water, tiled tank            |
| F16  | La Paz              | 10°20.7120'N-72°57.2620'O   | 1938               | Castillo General | 16                           | Fermentation with water, tiled tank               |
| F17  | La Paz              | 10°20.3640'N-72°57.3940'O   | 1616               | Castillo General | 16                           | Fermentation with water, concrete and tiled tank  |
| F18  | Pueblo Bello        | 10°22.5830'N-73°34.3244'O   | 1407               | Colombia         | 18                           | Fermentation with water, tiled tank               |
| F19  | La jagua de Ibirico | 09°32.199'N-73°10.319'O     | 1623               | Castillo General | 18                           | Fermentation with water, tiled tank               |
| F20  | La jagua de Ibirico | 09°31.784'N-73°10.380'O     | 1740               | Castillo General | 18                           | Fermentation without water, concrete tank         |

**Supplementary Table S2.** Coffee Harvest Characterization from 20 Farms within the Department of Cesar, Colombia.

| Farm | Sample     |  |                   |             |             |             |                 |                 |          | Total | Percentage | Category |
|------|------------|------------------------------------------------------------------------------------|-------------------|-------------|-------------|-------------|-----------------|-----------------|----------|-------|------------|----------|
|      |            | 1 (Green)*                                                                         | 2 (bright green)* | 3 (bright)* | 4 (Ripe 1)* | 5 (Ripe 2)* | 6 (Overripe 1)* | 7 (Overripe 2)* | 8 (Dry)* |       |            |          |
| F1   | Fruits     | 1                                                                                  | 11                | 14          | 22          | 30          | 46              | 74              | 16       | 214   | 0.38%      | Excelent |
|      | weight (g) | 1                                                                                  | 13                | 22          | 33          | 50          | 77              | 132             | 11       | 339   |            |          |
| F2   | Fruits     | 4                                                                                  | 5                 | 16          | 17          | 58          | 56              | 22              | 3        | 181   | 1.51%      | Excelent |
|      | weight (g) | 3.1                                                                                | 6                 | 30          | 32          | 108         | 110             | 34              | 2        | 325.1 |            |          |
| F3   | Fruits     | 2                                                                                  | 15                | 19          | 22          | 70          | 49              | 20              | 6        | 203   | 0.75%      | Excelent |
|      | weight (g) | 3                                                                                  | 21.6              | 31.4        | 39.6        | 127.4       | 100.1           | 41              | 4.5      | 368.6 |            |          |
| F4   | Fruits     | 5                                                                                  | 9                 | 20          | 20          | 60          | 55              | 28              | 9        | 206   | 1.88%      | Excelent |
|      | weight (g) | 5.4                                                                                | 9.6               | 31.6        | 31.6        | 92.5        | 100.9           | 46.9            | 8.7      | 327.2 |            |          |
| F5   | Fruits     | 8                                                                                  | 4                 | 4           | 18          | 26          | 65              | 98              | 7        | 230   | 3.01%      | Good     |
|      | weight (g) | 9.7                                                                                | 5.9               | 7.4         | 31          | 46          | 113.7           | 158.5           | 5.1      | 377.3 |            |          |
| F6   | Fruits     | 4                                                                                  | -                 | 13          | 15          | 48          | 23              | 90              | 10       | 203   | 1.51%      | Excelent |
|      | weight (g) | 6.7                                                                                | -                 | 18.4        | 24          | 85.5        | 40.9            | 150.6           | 9.8      | 335.9 |            |          |
| F7   | Fruits     | 1                                                                                  | 10                | 16          | 61          | 55          | 40              | 21              | 18       | 222   | 0.38%      | Excelent |
|      | weight (g) | 1.3                                                                                | 13.7              | 25.3        | 93.1        | 84.4        | 76.8            | 44.4            | 19.8     | 358.8 |            |          |
| F8   | Fruits     | -                                                                                  | 7                 | 30          | 38          | 36          | 67              | 24              | 25       | 227   | 0          | Excelent |
|      | weight (g) | -                                                                                  | 7.1               | 28.5        | 42.1        | 45.8        | 79.8            | 29.8            | 19.4     | 252.5 |            |          |
| F9   | Fruits     | 4                                                                                  | 26                | 33          | 48          | 54          | 31              | 30              | 20       | 246   | 1.51%      | Excelent |
|      | weight (g) | 7.6                                                                                | 41.3              | 53.1        | 76.8        | 87.1        | 56.5            | 48.5            | 18.2     | 389.1 |            |          |
| F10  | Fruits     | 8                                                                                  | 22                | 31          | 44          | 59          | 31              | 29              | 14       | 238   | 3.01%      | Good     |
|      | weight (g) | 13.9                                                                               | 34.7              | 48.3        | 69.4        | 90.8        | 49.8            | 48.1            | 12.8     | 367.8 |            |          |
| F11  | Fruits     | 3                                                                                  | 10                | 13          | 24          | 42          | 38              | 23              | 15       | 168   | 1.13%      | Excelent |
|      | weight (g) | 3.2                                                                                | 13.4              | 29.8        | 39.4        | 69.1        | 66.3            | 38.6            | 12.8     | 272.6 |            |          |
| F12  | Fruits     | 6                                                                                  | 8                 | 9           | 19          | 35          | 38              | 36              | 23       | 174   | 2.26%      | Good     |
|      | weight (g) | 9.1                                                                                | 15.4              | 16.8        | 32.7        | 58.5        | 63.1            | 59.6            | 17.4     | 272.6 |            |          |
| F13  | Fruits     | 4                                                                                  | 6                 | 13          | 21          | 33          | 38              | 36              | 26       | 177   | 1.51%      | Excelent |
|      | weight (g) | 4.7                                                                                | 11.8              | 23.4        | 35.8        | 57.1        | 63.4            | 61.7            | 20.4     | 278.3 |            |          |
| F14  | Fruits     | 3                                                                                  | 7                 | 18          | 22          | 36          | 35              | 38              | 9        | 168   | 1.13%      | Excelent |
|      | weight (g) | 3.2                                                                                | 13.5              | 33.4        | 37.1        | 59.8        | 60.1            | 63.7            | 7.4      | 278.2 |            |          |
| F15  | Fruits     | 5                                                                                  | 38                | 25          | 36          | 66          | 35              | 5               | 12       | 222   | 1.88%      | Excelent |
|      | weight (g) | 4.72                                                                               | 47                | 41          | 61          | 116         | 67              | 9.56            | 14.34    | 360.6 |            |          |
| F16  | Fruits     | 7                                                                                  | 16                | 53          | 48          | 33          | 44              | 14              | 8        | 223   | 2.63%      | Good     |
|      | weight (g) | 12.15                                                                              | 22                | 77          | 79          | 55          | 82              | 28              | 7        | 362.2 |            |          |
| F17  | Fruits     | 4                                                                                  | 1                 | 14          | 16          | 66          | 35              | 43              | 44       | 223   | 1.51%      | Excelent |
|      | weight (g) | 3.37                                                                               | 1.27              | 17          | 24          | 108         | 74              | 75              | 44       | 346.6 |            |          |
| F18  | Fruits     | 19                                                                                 | 9                 | 10          | -           | 144         | -               | 14              | 30       | 226   | 7.53%      | Medium   |
|      | weight (g) | 22.87                                                                              | 12.41             | 16.85       | -           | 230         | -               | 21              | 20.13    | 323.3 |            |          |
| F19  | Fruits     | -                                                                                  | 7                 | 27          | 43          | 125         | 12              | 15              | 6        | 235   | 0%         | Excelent |
|      | weight (g) | -                                                                                  | 10                | 43          | 84          | 202         | 18              | 6               | 5        | 368   |            |          |
| F20  | Fruits     | 3                                                                                  | 44                | 22          | 39          | 37          | 15              | 6               | 63       | 229   | 1.13%      | Excelent |
|      | weight (g) | 2.63                                                                               | 57                | 36          | 64          | 78          | 29              | 10              | 32       | 308.6 |            |          |

\*According color chart Cromacafé (Peñuela-Martínez. Guerrero and Sanz-Urbe. 2022)

Peñuela-Martínez. A. E., Guerrero. Á., & Sanz-Urbe. J. R. (2022). Cromacafé® Herramienta para identificar los estados de madurez de las variedades de café de fruto rojo. *Avances Técnicos Cenicafe*. 535. 1-8. <https://doi.org/10.38141/10779/0535>

**Supplementary Table S3.** Physico-chemical results of pH, Brix degrees, and total acidity of the mucilage throughout the coffee fermentation process in 20 farms from the Department of Cesar, Colombia.

| Farm | Time (h) | pH          | Brix degrees (°Bx) | Total acidity (mg L <sup>-1</sup> CaCO <sub>3</sub> ) | Sucrose     | Reducing sugars |
|------|----------|-------------|--------------------|-------------------------------------------------------|-------------|-----------------|
|      |          |             |                    |                                                       | %           |                 |
| F1   | 0        | 4.34 ± 0.54 | 5.00 ± 0.00        | 248.4 ± 30.00                                         | 0.04 ± 0.01 | 3.32 ± 0.77     |
|      | 18       | 3.30 ± 0.26 | 5.00 ± 0.00        | 538.4 ± 30.00                                         | 0.05 ± 0.02 | 1.78 ± 0.35     |
|      | 36       | 3.30 ± 0.26 | 4.00 ± 0.00        | 741.7 ± 75.10                                         | ND          | 0.38 ± 0.15     |
| F2   | 0        | 3.80 ± 0.27 | 4.50 ± 0.50        | 333.4 ± 65.00                                         | 0.03 ± 0.01 | 1.66 ± 0.81     |
|      | 18       | 3.90 ± 0.09 | 3.00 ± 0.00        | 408.4 ± 26.50                                         | ND          | 0.04 ± 0.01     |
|      | 36       | 3.97 ± 0.06 | 3.00 ± 0.00        | 408.4 ± 10.00                                         | 0.03 ± 0.01 | 0.04 ± 0.02     |
| F3   | 0        | 5.34 ± 0.30 | 11.67 ± 0.29       | 153.4 ± 13.20                                         | 0.20 ± 0.04 | 1.02 ± 0.21     |
|      | 10       | 4.33 ± 0.30 | 7.83 ± 0.29        | 265.1 ± 15.30                                         | 0.06 ± 0.02 | 0.61 ± 0.32     |
|      | 20       | 4.06 ± 0.06 | 4.00 ± 0.00        | 203.4 ± 8.70                                          | 0.15 ± 0.06 | 3.24 ± 0.02     |
| F4   | 0        | 5.39 ± 0.36 | 10.00 ± 0.00       | 128.4 ± 10.00                                         | 0.05 ± 0.01 | 7.24 ± 1.58     |
|      | 9        | 5.34 ± 0.29 | 8.17 ± 0.29        | 211.7 ± 15.30                                         | 0.03 ± 0.01 | 4.09 ± 0.09     |
|      | 18       | 5.39 ± 0.21 | 6.00 ± 0.00        | 208.4 ± 10.00                                         | 0.05 ± 0.01 | 3.92 ± 0.77     |
| F5   | 0        | 5.16 ± 0.17 | 3.67 ± 0.58        | 68.4 ± 10.00                                          | 0.75 ± 0.01 | 3.50 ± 1.08     |
|      | 9        | 4.84 ± 0.14 | 4.67 ± 0.76        | 123.4 ± 13.20                                         | 0.29 ± 0.09 | 1.33 ± 0.09     |
|      | 18       | 4.29 ± 0.26 | 4.00 ± 0.00        | 271.7 ± 5.80                                          | ND          | 1.51 ± 0.03     |
| F6   | 0        | 4.84 ± 0.20 | 6.00 ± 1.00        | 73.4 ± 5.00                                           | 0.45 ± 0.04 | 4.09 ± 1.08     |
|      | 21       | 3.17 ± 0.15 | 6.17 ± 0.29        | 351.7 ± 32.10                                         | 0.24 ± 0.06 | 1.93 ± 0.70     |
|      | 42       | 3.20 ± 0.17 | 4.00 ± 0.00        | 331.7 ± 15.30                                         | 0.05 ± 0.01 | 0.53 ± 0.13     |
| F7   | 0        | 4.52 ± 0.11 | 2.70 ± 0.00        | 197.5 ± 2.90                                          | ND          | 0.48 ± 0.20     |
|      | 18       | 4.20 ± 1.40 | 2.93 ± 0.06        | 289.7 ± 0.60                                          | 0.03 ± 0.01 | 0.08 ± 0.03     |
|      | 36       | 4.03 ± 0.01 | 2.63 ± 0.12        | 307.1 ± 3.20                                          | 0.03 ± 0.01 | 0.03 ± 0.00     |
| F8   | 0        | 5.31 ± 0.03 | 6.03 ± 0.06        | 41.6 ± 0.50                                           | 0.75 ± 0.09 | 4.26 ± 1.39     |
|      | 9        | 4.24 ± 0.02 | 4.30 ± 0.10        | 101.1 ± 3.60                                          | 0.05 ± 0.06 | 1.49 ± 0.59     |
|      | 18       | 3.52 ± 0.02 | 2.87 ± 0.06        | 217.0 ± 4.00                                          | 0.03 ± 0.05 | 0.31 ± 0.15     |
| F9   | 0        | 4.76 ± 0.02 | 4.80 ± 0.00        | 22.2 ± 1.20                                           | 0.28 ± 0.06 | 2.46 ± 0.14     |
|      | 9        | 3.95 ± 0.01 | 4.20 ± 0.17        | 95.5 ± 1.80                                           | 0.18 ± 0.01 | 2.19 ± 0.77     |
|      | 18       | 3.35 ± 0.00 | 3.93 ± 0.06        | 224.3 ± 4.60                                          | 0.05 ± 0.01 | 0.66 ± 0.33     |
| F10  | 0        | 5.08 ± 0.01 | 3.23 ± 0.06        | 11.6 ± 0.90                                           | 0.06 ± 0.01 | 1.28 ± 0.50     |
|      | 9        | 4.65 ± 0.01 | 2.37 ± 0.06        | 36.0 ± 1.60                                           | 0.02 ± 0.01 | 0.29 ± 0.13     |
|      | 18       | 4.04 ± 0.01 | 1.27 ± 0.06        | 32.5 ± 0.90                                           | 0.02 ± 0.01 | 0.04 ± 0.02     |
| F11  | 0        | 5.08 ± 0.05 | 4.07 ± 0.06        | 19.6 ± 0.80                                           | 0.11 ± 0.04 | 2.47 ± 1.11     |
|      | 18       | 3.50 ± 0.01 | 3.03 ± 0.32        | 194.2 ± 5.30                                          | 0.03 ± 0.01 | 0.26 ± 0.12     |
|      | 36       | 4.32 ± 0.03 | 3.00 ± 0.10        | 100.5 ± 1.00                                          | 0.02 ± 0.01 | 0.02 ± 0.01     |
| F12  | 0        | 5.39 ± 0.02 | 3.50 ± 0.00        | 5.3 ± 0.20                                            | 0.61 ± 0.06 | 2.19 ± 0.59     |
|      | 7        | 4.87 ± 0.01 | 2.07 ± 0.06        | 31.4 ± 1.70                                           | 0.06 ± 0.02 | 1.02 ± 0.34     |
|      | 14       | 3.69 ± 0.01 | 2.00 ± 0.00        | 84.5 ± 2.60                                           | 0.03 ± 0.01 | 0.34 ± 0.05     |
| F13  | 0        | 4.98 ± 0.01 | 5.13 ± 0.23        | 103.6 ± 2.90                                          | 0.75 ± 0.10 | 3.27 ± 0.32     |
|      | 8        | 4.31 ± 0.01 | 3.80 ± 0.10        | 198.3 ± 1.30                                          | 0.18 ± 0.08 | 2.64 ± 0.60     |
|      | 16       | 3.48 ± 0.01 | 3.23 ± 0.15        | 423.8 ± 4.40                                          | 0.13 ± 0.04 | 1.45 ± 0.29     |
| F14  | 0        | 5.19 ± 0.03 | 8.23 ± 0.23        | 129.0 ± 7.60                                          | 0.49 ± 0.05 | 5.79 ± 0.89     |

|     |    |             |             |               |             |             |
|-----|----|-------------|-------------|---------------|-------------|-------------|
|     | 5  | 4.81 ± 0.01 | 5.67 ± 0.55 | 146.9 ± 1.80  | 0.14 ± 0.01 | 4.01 ± 0.50 |
|     | 10 | 4.19 ± 0.02 | 5.00 ± 0.00 | 282.7 ± 21.20 | 0.03 ± 0.01 | 3.02 ± 0.27 |
| F15 | 0  | 5.69 ± 0.02 | 3.80 ± 0.00 | 56.9 ± 2.60   | 0.26 ± 0.01 | 2.63 ± 0.14 |
|     | 8  | 5.05 ± 0.03 | 3.27 ± 0.15 | 74.8 ± 4.90   | 0.09 ± 0.04 | 2.35 ± 0.31 |
|     | 16 | 3.66 ± 0.01 | 3.03 ± 0.06 | 134.9 ± 14.10 | 0.13 ± 0.06 | 1.74 ± 0.20 |
| F16 | 0  | 5.75 ± 0.02 | 3.03 ± 0.06 | 25.5 ± 1.50   | 0.11 ± 0.04 | 2.13 ± 0.11 |
|     | 8  | 5.34 ± 0.00 | 2.77 ± 0.15 | 50.3 ± 1.50   | 0.13 ± 0.06 | 1.92 ± 0.32 |
|     | 16 | 3.95 ± 0.00 | 2.83 ± 0.12 | 115.6 ± 5.00  | 0.09 ± 0.01 | 1.29 ± 0.52 |
| F17 | 0  | 5.30 ± 0.02 | 3.37 ± 0.15 | 57.5 ± 3.00   | 0.04 ± 0.01 | 2.21 ± 0.04 |
|     | 8  | 4.83 ± 0.02 | 4.30 ± 0.10 | 86.7 ± 1.60   | 0.01 ± 0.00 | 2.14 ± 0.39 |
|     | 16 | 3.78 ± 0.01 | 3.53 ± 0.12 | 165.8 ± 5.90  | 0.01 ± 0.00 | 1.37 ± 0.31 |
| F18 | 0  | 3.89 ± 0.01 | 3.60 ± 0.20 | 117.9 ± 14.00 | 0.04 ± 0.01 | 1.09 ± 0.61 |
|     | 9  | 4.26 ± 0.02 | 3.40 ± 0.10 | 49.7 ± 7.00   | 0.11 ± 0.40 | 2.31 ± 0.07 |
|     | 18 | 3.68 ± 0.02 | 4.20 ± 0.10 | 120.0 ± 3.30  | 0.23 ± 0.04 | 2.17 ± 0.42 |
| F19 | 0  | 4.84 ± 0.03 | 2.20 ± 0.10 | 4.1 ± 2.40    | ND          | 1.38 ± 0.13 |
|     | 9  | 4.76 ± 0.06 | 2.93 ± 0.06 | 28.5 ± 4.30   | 0.01 ± 0.00 | 1.63 ± 0.55 |
|     | 18 | 3.28 ± 0.02 | 3.90 ± 0.30 | 120.5 ± 8.50  | 0.02 ± 0.01 | 0.53 ± 0.28 |
| F20 | 0  | 4.66 ± 0.02 | 3.23 ± 0.32 | 10.2 ± 2.60   | ND          | 1.08 ± 0.39 |
|     | 9  | 4.49 ± 0.02 | 1.70 ± 0.26 | 80.4 ± 3.50   | 0.01 ± 0.00 | 0.30 ± 0.10 |
|     | 18 | 3.64 ± 0.02 | 2.13 ± 0.15 | 314.7 ± 7.70  | ND          | 0.10 ± 0.01 |

\*ND: Not Detected

**Supplementary Table S4.** Microbial counts from the coffee mucilage throughout the coffee fermentation process in 20 farms from the Department of Cesar, Colombia.

| Farm | Fermentation<br>Time (h) | Mesophiles    | Acid Lactic<br>bacteria (LAB) | Coliforms | Yeast | Mycelial Fungi |
|------|--------------------------|---------------|-------------------------------|-----------|-------|----------------|
|      |                          | Log 10 cfu/mL |                               |           |       |                |
| F1   | 0                        | 5.23          | 5.68                          | 3.30      | 5.40  | 4.43           |
|      | 18                       | 5.64          | 3.30                          | 3.30      | 5.53  | 4.38           |
|      | 36                       | 5.11          | 3.30                          | 3.00      | 5.34  | 4.43           |
| F2   | 0                        | 5.56          | 3.30                          | 3.00      | 5.80  | 3.30           |
|      | 18                       | 4.90          | 3.90                          | 3.00      | 6.02  | 3.30           |
|      | 36                       | 5.61          | 3.30                          | 3.30      | 5.74  | 3.00           |
| F3   | 0                        | 5.76          | 6.43                          | 3.00      | 6.10  | 3.30           |
|      | 10                       | 5.76          | 6.43                          | 3.00      | 6.00  | 3.70           |
|      | 20                       | 5.98          | 3.30                          | 4.28      | 5.99  | 3.00           |
| F4   | 0                        | 6.05          | 6.35                          | 5.20      | 5.99  | 4.08           |
|      | 9                        | 5.69          | 6.24                          | 3.48      | 5.04  | 4.00           |
|      | 18                       | 5.91          | 6.42                          | ND        | 6.02  | 3.48           |
| F5   | 0                        | 5.30          | 6.25                          | 3.70      | 5.52  | 3.30           |
|      | 9                        | 6.00          | 6.43                          | 4.20      | 6.15  | 3.30           |
|      | 18                       | 6.08          | 5.94                          | 3.00      | 5.92  | 3.00           |
| F6   | 0                        | 5.74          | 4.41                          | 4.89      | 5.90  | 3.30           |
|      | 21                       | 6.22          | 3.60                          | 3.00      | 6.18  | 3.70           |
|      | 42                       | 6.60          | 3.48                          | 3.00      | 6.41  | 3.00           |
| F7   | 0                        | 5.68          | 9.51                          | 4.00      | 5.90  | ND             |
|      | 18                       | 5.75          | 9.07                          | 3.85      | 5.86  | ND             |
|      | 36                       | 5.82          | 8.89                          | 3.78      | 5.66  | ND             |
| F8   | 0                        | 5.88          | 8.48                          | 5.45      | 5.50  | ND             |
|      | 9                        | 5.81          | 9.09                          | 5.35      | 5.47  | ND             |
|      | 18                       | 5.79          | 9.07                          | 5.31      | 5.65  | ND             |
| F9   | 0                        | 5.62          | 5.93                          | 5.58      | 5.87  | 3.60           |
|      | 9                        | 6.12          | 5.97                          | 4.92      | 5.78  | 3.60           |
|      | 18                       | 6.09          | 5.85                          | 4.63      | 5.82  | ND             |
| F10  | 0                        | 5.65          | 5.89                          | 4.93      | 5.62  | 3.48           |
|      | 9                        | 5.53          | 5.89                          | 5.16      | 5.48  | 3.60           |
|      | 18                       | 5.27          | 5.87                          | 5.07      | 5.75  | 4.08           |
| F11  | 0                        | 5.65          | 6.09                          | 4.77      | 5.74  | 3.60           |
|      | 18                       | 5.83          | 6.02                          | 4.49      | 5.69  | 3.30           |
|      | 36                       | 5.66          | 5.92                          | 5.22      | 5.92  | 3.70           |
| F12  | 0                        | 5.30          | 5.99                          | 4.93      | 5.76  | ND             |
|      | 7                        | 5.69          | 5.97                          | 3.95      | 5.72  | 3.00           |
|      | 14                       | 5.67          | 6.01                          | 4.30      | 5.09  | ND             |
| F13  | 0                        | 5.45          | 7.14                          | 4.26      | 5.56  | ND             |
|      | 8                        | 5.21          | 7.11                          | ND        | 5.64  | ND             |

|     |    |      |      |      |      |      |
|-----|----|------|------|------|------|------|
|     | 16 | 4.59 | 7.04 | ND   | 5.82 | ND   |
| F14 | 0  | 5.50 | 7.18 | 4.94 | 5.79 | 3.70 |
|     | 5  | 5.42 | 7.08 | 4.41 | 5.55 | 3.78 |
|     | 10 | 5.65 | 6.71 | 4.83 | 6.02 | 3.60 |
| F15 | 0  | 5.46 | 5.90 | 4.00 | 5.81 | 3.78 |
|     | 8  | 5.25 | 5.78 | 4.28 | 5.77 | 3.60 |
|     | 16 | 5.27 | 5.90 | 4.59 | 5.95 | 3.30 |
| F16 | 0  | 5.59 | 6.04 | 4.46 | 5.90 | 3.30 |
|     | 8  | 5.47 | 6.03 | 4.18 | 5.88 | 2.70 |
|     | 16 | 5.42 | 5.83 | 4.60 | 5.87 | 3.60 |
| F17 | 0  | 5.59 | 7.14 | 5.15 | 5.68 | 3.60 |
|     | 8  | 5.57 | 7.13 | 4.54 | 5.52 | 3.60 |
|     | 16 | 5.52 | 7.14 | 4.48 | 5.65 | 3.30 |
| F18 | 0  | 5.13 | 7.15 | 3.85 | 5.61 | 3.00 |
|     | 9  | 5.02 | 7.21 | 4.71 | 5.42 | 3.60 |
|     | 18 | 5.50 | 7.23 | 4.98 | 5.41 | 3.60 |
| F19 | 0  | 5.48 | 7.22 | 4.30 | 5.52 | 3.30 |
|     | 9  | 4.98 | 7.29 | 3.70 | 5.36 | 3.30 |
|     | 18 | 4.94 | 7.29 | 3.00 | 5.46 | 3.60 |
| F20 | 0  | 5.41 | 7.12 | 3.60 | 5.26 | 3.70 |
|     | 9  | 5.28 | 7.22 | 3.30 | 5.26 | 3.48 |
|     | 18 | 5.29 | 7.24 | ND   | 5.08 | 3.00 |

ND: Non detected

**Supplementary Table S5.** High throughput sequencing of 16S rRNA gene with the MiSeq platform from Illumina and richness and diversity indices during coffee fermentation in 20 farms department of Cesar, Colombia.

| Farm | Fermentation Time (h) | Read Count | Q30 (%) | nseqs | Coverage | Genus-Species Observed (OTUs) | ACE     | Shannon | Simpson |
|------|-----------------------|------------|---------|-------|----------|-------------------------------|---------|---------|---------|
| F1   | 0                     | 189.24     | 85.50   | 14098 | 0.99     | 337                           | 585.30  | 2.27    | 0.79    |
|      | 18                    | 171.07     | 86.80   | 14127 | 0.99     | 298                           | 519.70  | 2.46    | 0.83    |
|      | 36                    | 186.24     | 84.80   | 14128 | 0.99     | 198                           | 344.93  | 1.97    | 0.70    |
| F2   | 0                     | 163.35     | 85.00   | 14028 | 0.99     | 361                           | 652.07  | 1.90    | 0.52    |
|      | 18                    | 162.28     | 86.90   | 14104 | 0.99     | 218                           | 398.49  | 1.91    | 0.68    |
|      | 36                    | 192.81     | 86.90   | 14112 | 0.99     | 244                           | 563.27  | 1.77    | 0.65    |
| F3   | 0                     | 191.89     | 85.40   | 14260 | 0.98     | 422                           | 1085.03 | 2.55    | 0.85    |
|      | 10                    | 203.32     | 86.10   | 14091 | 0.99     | 244                           | 397.34  | 1.92    | 0.70    |
|      | 20                    | 174.42     | 86.60   | 14102 | 0.99     | 189                           | 345.77  | 1.58    | 0.63    |
| F4   | 0                     | 186.57     | 85.20   | 14161 | 0.99     | 342                           | 507.73  | 1.77    | 0.53    |
|      | 9                     | 195.14     | 86.80   | 14112 | 0.99     | 183                           | 284.92  | 2.13    | 0.79    |
|      | 18                    | 193.86     | 85.80   | 14067 | 0.99     | 259                           | 497.14  | 2.22    | 0.79    |



|     |    |        |       |       |      |      |         |      |      |
|-----|----|--------|-------|-------|------|------|---------|------|------|
| F5  | 0  | 202.91 | 84.30 | 14198 | 0.98 | 488  | 1144.80 | 2.41 | 0.77 |
|     | 9  | 175.52 | 85.60 | 14237 | 0.98 | 502  | 1141.33 | 3.01 | 0.87 |
|     | 18 | 206.94 | 85.80 | 14116 | 0.99 | 219  | 567.24  | 2.20 | 0.81 |
| F6  | 0  | 191.56 | 85.50 | 14273 | 0.98 | 412  | 1163.83 | 2.70 | 0.88 |
|     | 21 | 200.77 | 87.00 | 14135 | 0.99 | 184  | 377.80  | 2.10 | 0.78 |
|     | 42 | 153.73 | 86.40 | 14115 | 0.99 | 172  | 279.66  | 2.18 | 0.79 |
| F7  | 0  | 229.43 | 79.60 | 18622 | 0.99 | 395  | 674.70  | 2.50 | 0.85 |
|     | 18 | 247.78 | 80.90 | 18721 | 0.99 | 305  | 674.40  | 2.10 | 0.80 |
|     | 36 | 222.81 | 80.40 | 18688 | 0.99 | 287  | 506.20  | 1.90 | 0.75 |
| F8  | 0  | 227.16 | 79.00 | 18953 | 0.96 | 1008 | 256.80  | 3.70 | 0.92 |
|     | 9  | 233.25 | 79.60 | 18576 | 0.98 | 598  | 110.20  | 3.10 | 0.90 |
|     | 18 | 225.90 | 79.40 | 18663 | 0.98 | 425  | 715.80  | 2.50 | 0.86 |
| F9  | 0  | 237.51 | 79.30 | 18915 | 0.97 | 940  | 199.90  | 4.00 | 0.95 |
|     | 9  | 203.63 | 78.60 | 18535 | 0.98 | 487  | 805.00  | 2.80 | 0.85 |
|     | 18 | 158.63 | 80.00 | 18603 | 0.99 | 298  | 544.00  | 2.30 | 0.83 |
| F10 | 0  | 212.41 | 79.50 | 18894 | 0.97 | 951  | 220.10  | 4.10 | 0.95 |
|     | 9  | 217.30 | 79.10 | 18595 | 0.98 | 433  | 762.70  | 2.40 | 0.79 |
|     | 18 | 197.48 | 79.90 | 18601 | 0.98 | 436  | 764.60  | 2.60 | 0.82 |
| F11 | 0  | 196.53 | 78.60 | 18897 | 0.97 | 817  | 252.10  | 3.70 | 0.94 |
|     | 18 | 211.95 | 80.10 | 18676 | 0.98 | 377  | 839.60  | 2.10 | 0.78 |
|     | 36 | 195.33 | 80.50 | 18700 | 0.99 | 337  | 563.80  | 2.20 | 0.74 |
| F12 | 0  | 202.45 | 79.50 | 18913 | 0.97 | 765  | 222.50  | 2.80 | 0.84 |
|     | 7  | 178.44 | 79.90 | 18908 | 0.97 | 668  | 221.00  | 2.60 | 0.81 |
|     | 14 | 230.04 | 80.20 | 18653 | 0.99 | 284  | 586.10  | 2.20 | 0.79 |
| F13 | 0  | 196.49 | 79.80 | 18882 | 0.97 | 812  | 1993.60 | 3.20 | 0.87 |
|     | 8  | 215.42 | 81.20 | 18675 | 0.98 | 350  | 771.20  | 1.90 | 0.61 |
|     | 16 | 232.86 | 80.50 | 18680 | 0.99 | 305  | 695.20  | 2.40 | 0.86 |
| F14 | 0  | 192.59 | 79.00 | 18863 | 0.96 | 1002 | 2762.70 | 3.80 | 0.93 |
|     | 5  | 167.40 | 79.10 | 18906 | 0.96 | 906  | 2701.70 | 3.50 | 0.91 |
|     | 10 | 176.09 | 80.30 | 18556 | 0.99 | 366  | 661.80  | 2.50 | 0.84 |
| F15 | 0  | 209.90 | 78.90 | 18765 | 0.98 | 524  | 869.90  | 2.90 | 0.83 |
|     | 8  | 237.55 | 78.70 | 18965 | 0.97 | 843  | 2180.80 | 3.00 | 0.89 |
|     | 16 | 230.69 | 79.30 | 18675 | 0.99 | 269  | 474.90  | 2.50 | 0.86 |
| F16 | 0  | 219.79 | 78.40 | 18817 | 0.98 | 560  | 853.80  | 3.20 | 0.86 |
|     | 7  | 188.35 | 78.80 | 18788 | 0.98 | 546  | 1449.20 | 2.80 | 0.86 |
|     | 14 | 201.87 | 79.90 | 18650 | 0.99 | 273  | 502.40  | 2.60 | 0.88 |
| F17 | 0  | 217.16 | 79.20 | 18949 | 0.96 | 927  | 2499.40 | 3.50 | 0.91 |
|     | 8  | 160.10 | 78.80 | 18840 | 0.97 | 822  | 2171.70 | 3.40 | 0.91 |
|     | 16 | 196.06 | 79.90 | 18552 | 0.98 | 457  | 807.30  | 2.70 | 0.87 |
| F18 | 0  | 167.43 | 79.00 | 18894 | 0.97 | 701  | 2012.00 | 3.00 | 0.90 |

|     |    |        |       |       |      |     |         |      |      |
|-----|----|--------|-------|-------|------|-----|---------|------|------|
|     | 9  | 217.42 | 79.20 | 18523 | 0.98 | 424 | 768.80  | 2.70 | 0.86 |
|     | 18 | 198.37 | 80.10 | 18582 | 0.99 | 343 | 615.60  | 2.70 | 0.90 |
|     | 0  | 216.47 | 79.20 | 18926 | 0.97 | 883 | 2446.30 | 3.40 | 0.91 |
| F19 | 9  | 253.56 | 80.40 | 18640 | 0.98 | 415 | 1005.40 | 2.50 | 0.82 |
|     | 18 | 202.02 | 79.70 | 18670 | 0.99 | 305 | 592.10  | 2.30 | 0.84 |
|     | 0  | 119.23 | 79.10 | 18857 | 0.98 | 767 | 1187.20 | 3.80 | 0.93 |
| F20 | 9  | 178.11 | 80.20 | 18937 | 0.97 | 877 | 2150.60 | 3.30 | 0.87 |
|     | 18 | 209.35 | 79.50 | 18669 | 0.98 | 431 | 806.00  | 2.10 | 0.79 |

**Supplementary Table S6.** Identification and frequency of mesophilic aerobic bacteria isolated into pure culture in coffee mucilage during the fermentation process at three different times in the 20 studied farms.

| Microorganism                       | Time | Farms |    |    |    |    |    |    |    |    |     |     |     |     |     |     |     |     |     |     |     | Frequency by farms |      |
|-------------------------------------|------|-------|----|----|----|----|----|----|----|----|-----|-----|-----|-----|-----|-----|-----|-----|-----|-----|-----|--------------------|------|
|                                     |      | F1    | F2 | F3 | F4 | F5 | F6 | F7 | F8 | F9 | F10 | F11 | F12 | F13 | F14 | F15 | F16 | F17 | F18 | F19 | F20 | #                  | %    |
| <i>Acinetobacter iwoffii</i>        | T3   |       |    |    |    |    |    |    |    |    |     |     |     |     |     |     |     |     |     |     |     | 1                  | 5.0  |
| <i>Acinetobacter haemolyticus</i>   | T1   |       |    |    |    |    |    |    |    |    |     |     |     |     |     |     |     |     |     |     |     | 1                  | 5.0  |
|                                     | T2   |       |    |    |    |    |    |    |    |    |     |     |     |     |     |     |     |     |     |     |     |                    |      |
|                                     | T3   |       |    |    |    |    |    |    |    |    |     |     |     |     |     |     |     |     |     |     |     |                    |      |
| <i>Acinetobacter calcoacético</i>   | T1   |       |    |    |    |    |    |    |    |    |     |     |     |     |     |     |     |     |     |     |     | 1                  | 5.0  |
|                                     | T2   |       |    |    |    |    |    |    |    |    |     |     |     |     |     |     |     |     |     |     |     |                    |      |
|                                     | T3   |       |    |    |    |    |    |    |    |    |     |     |     |     |     |     |     |     |     |     |     |                    |      |
| <i>Acinetobacter baumani</i>        | T1   |       |    |    |    |    |    |    |    |    |     |     |     |     |     |     |     |     |     |     |     | 3                  | 15.0 |
|                                     | T2   |       |    |    |    |    |    |    |    |    |     |     |     |     |     |     |     |     |     |     |     |                    |      |
|                                     | T3   |       |    |    |    |    |    |    |    |    |     |     |     |     |     |     |     |     |     |     |     |                    |      |
| <i>Averyella</i> spp.               | T1   |       |    |    |    |    |    |    |    |    |     |     |     |     |     |     |     |     |     |     |     | 1                  | 5.0  |
|                                     | T2   |       |    |    |    |    |    |    |    |    |     |     |     |     |     |     |     |     |     |     |     |                    |      |
|                                     | T3   |       |    |    |    |    |    |    |    |    |     |     |     |     |     |     |     |     |     |     |     |                    |      |
| <i>Averyella dalhousiensis</i>      | T1   |       |    |    |    |    |    |    |    |    |     |     |     |     |     |     |     |     |     |     |     | 2                  | 10.0 |
|                                     | T2   |       |    |    |    |    |    |    |    |    |     |     |     |     |     |     |     |     |     |     |     |                    |      |
|                                     | T3   |       |    |    |    |    |    |    |    |    |     |     |     |     |     |     |     |     |     |     |     |                    |      |
| <i>Bacillus</i> spp.                | T1   |       |    |    |    |    |    |    |    |    |     |     |     |     |     |     |     |     |     |     |     |                    |      |
|                                     | T2   |       |    |    |    |    |    |    |    |    |     |     |     |     |     |     |     |     |     |     |     | 3                  | 15.0 |
|                                     | T3   |       |    |    |    |    |    |    |    |    |     |     |     |     |     |     |     |     |     |     |     |                    |      |
| <i>Bacillus subtilis</i>            | T1   |       |    |    |    |    |    |    |    |    |     |     |     |     |     |     |     |     |     |     |     | 4                  | 20.0 |
|                                     | T2   |       |    |    |    |    |    |    |    |    |     |     |     |     |     |     |     |     |     |     |     |                    |      |
|                                     | T3   |       |    |    |    |    |    |    |    |    |     |     |     |     |     |     |     |     |     |     |     |                    |      |
| <i>Bacillus firmus</i>              | T1   |       |    |    |    |    |    |    |    |    |     |     |     |     |     |     |     |     |     |     |     | 5                  | 25.0 |
|                                     | T2   |       |    |    |    |    |    |    |    |    |     |     |     |     |     |     |     |     |     |     |     |                    |      |
|                                     | T3   |       |    |    |    |    |    |    |    |    |     |     |     |     |     |     |     |     |     |     |     |                    |      |
| <i>Bacillus megaterium</i>          | T1   |       |    |    |    |    |    |    |    |    |     |     |     |     |     |     |     |     |     |     |     | 1                  | 5.0  |
|                                     | T2   |       |    |    |    |    |    |    |    |    |     |     |     |     |     |     |     |     |     |     |     |                    |      |
|                                     | T3   |       |    |    |    |    |    |    |    |    |     |     |     |     |     |     |     |     |     |     |     |                    |      |
| <i>Bacillus cereus</i>              | T1   |       |    |    |    |    |    |    |    |    |     |     |     |     |     |     |     |     |     |     |     | 1                  | 5.0  |
|                                     | T2   |       |    |    |    |    |    |    |    |    |     |     |     |     |     |     |     |     |     |     |     |                    |      |
|                                     | T3   |       |    |    |    |    |    |    |    |    |     |     |     |     |     |     |     |     |     |     |     |                    |      |
| <i>Bordetella</i> spp.              | T1   |       |    |    |    |    |    |    |    |    |     |     |     |     |     |     |     |     |     |     |     | 1                  | 5.0  |
|                                     | T2   |       |    |    |    |    |    |    |    |    |     |     |     |     |     |     |     |     |     |     |     |                    |      |
|                                     | T3   |       |    |    |    |    |    |    |    |    |     |     |     |     |     |     |     |     |     |     |     |                    |      |
| <i>Citrobacter freundii</i>         | T1   |       |    |    |    |    |    |    |    |    |     |     |     |     |     |     |     |     |     |     |     | 3                  | 15.0 |
|                                     | T2   |       |    |    |    |    |    |    |    |    |     |     |     |     |     |     |     |     |     |     |     |                    |      |
|                                     | T3   |       |    |    |    |    |    |    |    |    |     |     |     |     |     |     |     |     |     |     |     |                    |      |
| <i>Chryseobacterium indologenes</i> | T1   |       |    |    |    |    |    |    |    |    |     |     |     |     |     |     |     |     |     |     |     | 1                  | 5.0  |
|                                     | T2   |       |    |    |    |    |    |    |    |    |     |     |     |     |     |     |     |     |     |     |     |                    |      |
|                                     | T3   |       |    |    |    |    |    |    |    |    |     |     |     |     |     |     |     |     |     |     |     |                    |      |
| <i>Chromobacterium violaceum</i>    | T1   |       |    |    |    |    |    |    |    |    |     |     |     |     |     |     |     |     |     |     |     | 1                  | 5.0  |
|                                     | T2   |       |    |    |    |    |    |    |    |    |     |     |     |     |     |     |     |     |     |     |     |                    |      |
|                                     | T3   |       |    |    |    |    |    |    |    |    |     |     |     |     |     |     |     |     |     |     |     |                    |      |
| <i>Enterobacter cloacae</i>         | T1   |       |    |    |    |    |    |    |    |    |     |     |     |     |     |     |     |     |     |     |     | 3                  | 15.0 |
|                                     | T2   |       |    |    |    |    |    |    |    |    |     |     |     |     |     |     |     |     |     |     |     |                    |      |
|                                     | T3   |       |    |    |    |    |    |    |    |    |     |     |     |     |     |     |     |     |     |     |     |                    |      |
| <i>Enterobacter gergoviae</i>       | T1   |       |    |    |    |    |    |    |    |    |     |     |     |     |     |     |     |     |     |     |     | 1                  | 5.0  |
|                                     | T2   |       |    |    |    |    |    |    |    |    |     |     |     |     |     |     |     |     |     |     |     |                    |      |
|                                     | T3   |       |    |    |    |    |    |    |    |    |     |     |     |     |     |     |     |     |     |     |     |                    |      |
| <i>Enterobacter aerogenes</i>       | T1   |       |    |    |    |    |    |    |    |    |     |     |     |     |     |     |     |     |     |     |     | 2                  | 10.0 |
|                                     | T2   |       |    |    |    |    |    |    |    |    |     |     |     |     |     |     |     |     |     |     |     |                    |      |
|                                     | T3   |       |    |    |    |    |    |    |    |    |     |     |     |     |     |     |     |     |     |     |     |                    |      |
|                                     | T1   |       |    |    |    |    |    |    |    |    |     |     |     |     |     |     |     |     |     |     |     | 2                  | 10.0 |



T1 (zero hours of fermentation). T2 (middle of the fermentation time). T3 (end of the fermentation time).

**Supplementary Table S7.** High throughput sequencing of ITS with the MiSeq platform from Illumina and richness and diversity indices during coffee fermentation in 20 farms department of Cesar, Colombia.

| Farm | Fermentation Time (h) | Read Count | Q30 (%) | nseqs | Coverage | Genus-Species Observed (OTUs) | ACE     | Shannon | Simpson |
|------|-----------------------|------------|---------|-------|----------|-------------------------------|---------|---------|---------|
| F1   | 0                     | 264,51     | 86.40   | 73912 | 1.00     | 285                           | 180.14  | 1.19    | 0.47    |
|      | 18                    | 294.06     | 87.50   | 75590 | 1.00     | 579                           | 499.39  | 2.51    | 0.82    |
|      | 36                    | 241.83     | 88.50   | 54916 | 1.00     | 319                           | 182.92  | 1.98    | 0.75    |
| F2   | 0                     | 215.12     | 87.30   | 54480 | 0.99     | 573                           | 471.65  | 1.72    | 0.55    |
|      | 18                    | 316.11     | 89.30   | 93557 | 1.00     | 453                           | 645.86  | 0.92    | 0.32    |
|      | 36                    | 230.46     | 88.70   | 57637 | 1.00     | 343                           | 276.52  | 1.33    | 0.50    |
| F3   | 0                     | 204.37     | 84.00   | 51124 | 1.00     | 367                           | 1427.46 | 0.94    | 0.36    |
|      | 10                    | 243.03     | 85.40   | 62868 | 1.00     | 447                           | 312.50  | 1.21    | 0.43    |
|      | 20                    | 215.46     | 85.00   | 50101 | 1.00     | 378                           | 1231.31 | 1.33    | 0.47    |
| F4   | 0                     | 233.13     | 78.50   | 39420 | 0.99     | 629                           | 1844.76 | 2.39    | 0.70    |
|      | 9                     | 229.81     | 82.80   | 47070 | 1.00     | 398                           | 1127.93 | 2.13    | 0.80    |
|      | 18                    | 209.28     | 84.40   | 47881 | 0.99     | 541                           | 2155.69 | 2.30    | 0.79    |
| F5   | 0                     | 246.65     | 80.30   | 40141 | 0.99     | 465                           | 1498.72 | 2.75    | 0.86    |
|      | 9                     | 243.72     | 81.50   | 44438 | 0.99     | 505                           | 1751.26 | 2.71    | 0.87    |
|      | 18                    | 240.07     | 85.00   | 48749 | 0.99     | 424                           | 1760.97 | 2.26    | 0.74    |
| F6   | 0                     | 239.76     | 83.20   | 53122 | 1.00     | 472                           | 406.61  | 2.14    | 0.78    |
|      | 21                    | 282.80     | 87.50   | 76501 | 1.00     | 417                           | 349.86  | 1.61    | 0.56    |
|      | 42                    | 265.28     | 89.10   | 70627 | 1.00     | 282                           | 270.08  | 1.42    | 0.62    |
| F7   | 0                     | 152.35     | 76.90   | 11242 | 0.99     | 188                           | 420.30  | 1.20    | 0.44    |
|      | 18                    | 170.88     | 76.00   | 13390 | 0.99     | 177                           | 377.60  | 1.20    | 0.47    |
|      | 36                    | 190.06     | 76.60   | 13135 | 0.99     | 184                           | 428.80  | 1.00    | 0.34    |
| F8   | 0                     | 207.50     | 78.60   | 36781 | 0.99     | 195                           | 397.50  | 2.10    | 0.73    |
|      | 9                     | 218.63     | 80.20   | 47866 | 0.99     | 119                           | 229.10  | 1.20    | 0.43    |
|      | 18                    | 216.11     | 81.60   | 47734 | 0.99     | 71                            | 986.90  | 1.10    | 0.52    |
| F9   | 0                     | 209.08     | 77.90   | 39784 | 0.99     | 163                           | 384.80  | 2.00    | 0.78    |
|      | 9                     | 198.04     | 82.10   | 52060 | 0.99     | 78                            | 127.70  | 1.10    | 0.48    |
|      | 18                    | 205.34     | 81.20   | 43044 | 0.99     | 92                            | 243.80  | 1.20    | 0.59    |
| F10  | 0                     | 181.31     | 79.20   | 33151 | 0.99     | 203                           | 555.70  | 2.20    | 0.81    |
|      | 9                     | 224.50     | 81.30   | 51075 | 0.99     | 88                            | 153.50  | 1.30    | 0.56    |
|      | 18                    | 210.54     | 81.70   | 48125 | 0.99     | 96                            | 180.30  | 1.30    | 0.56    |
| F11  | 0                     | 251.14     | 79.40   | 46909 | 0.99     | 108                           | 176.90  | 2.00    | 0.79    |
|      | 18                    | 243.23     | 79.80   | 42525 | 0.99     | 123                           | 275.70  | 1.60    | 0.73    |
|      | 36                    | 261.52     | 81.00   | 40143 | 0.99     | 110                           | 252.90  | 1.60    | 0.69    |
| F12  | 0                     | 190.38     | 78.50   | 40863 | 0.99     | 173                           | 463.30  | 1.50    | 0.54    |

|     |    |        |       |       |      |     |        |      |      |
|-----|----|--------|-------|-------|------|-----|--------|------|------|
|     | 7  | 207.15 | 81.20 | 52436 | 0.99 | 82  | 141.50 | 0.80 | 0.32 |
|     | 14 | 228.74 | 81.90 | 59603 | 0.99 | 61  | 133.20 | 0.60 | 0.25 |
|     |    |        |       |       |      |     |        |      |      |
| F13 | 0  | 195.78 | 75.00 | 27329 | 0.99 | 205 | 412.30 | 2.10 | 0.74 |
|     | 8  | 190.70 | 78.70 | 41181 | 0.99 | 148 | 413.80 | 1.10 | 0.42 |
|     | 16 | 212.15 | 81.60 | 47208 | 0.99 | 68  | 109.20 | 1.30 | 0.56 |
| F14 | 0  | 244.90 | 76.80 | 38659 | 0.99 | 204 | 548.30 | 2.20 | 0.83 |
|     | 5  | 263.88 | 80.00 | 48442 | 0.99 | 118 | 223.50 | 1.80 | 0.72 |
|     | 10 | 252.09 | 81.90 | 55383 | 0.99 | 79  | 131.30 | 1.50 | 0.65 |
| F15 | 0  | 210.91 | 73.10 | 21984 | 0.99 | 256 | 713.90 | 2.10 | 0.77 |
|     | 8  | 174.63 | 76.10 | 20722 | 0.99 | 242 | 554.90 | 2.00 | 0.76 |
|     | 16 | 228.12 | 80.10 | 38520 | 0.99 | 138 | 311.50 | 1.90 | 0.73 |
| F16 | 0  | 244.11 | 75.90 | 40329 | 0.99 | 177 | 323.40 | 1.80 | 0.70 |
|     | 7  | 281.36 | 75.70 | 37816 | 0.99 | 161 | 305.40 | 2.30 | 0.83 |
|     | 14 | 213.52 | 79.00 | 35953 | 0.99 | 136 | 223.80 | 2.10 | 0.67 |
| F17 | 0  | 242.82 | 79.50 | 39726 | 0.99 | 150 | 383.40 | 2.00 | 0.80 |
|     | 8  | 200.71 | 79.50 | 34202 | 0.99 | 138 | 324.30 | 2.10 | 0.79 |
|     | 16 | 231.17 | 79.60 | 39525 | 0.99 | 132 | 382.70 | 1.70 | 0.72 |
| F18 | 0  | 212.76 | 81.00 | 47012 | 0.99 | 77  | 127.30 | 1.50 | 0.60 |
|     | 9  | 202.67 | 80.80 | 50092 | 0.99 | 81  | 192.60 | 1.10 | 0.44 |
|     | 18 | 217.59 | 81.00 | 49098 | 0.99 | 68  | 105.30 | 1.20 | 0.47 |
| F19 | 0  | 224.89 | 77.80 | 39283 | 0.99 | 213 | 491.50 | 2.40 | 0.81 |
|     | 9  | 245.74 | 80.50 | 54517 | 0.99 | 112 | 220.00 | 1.40 | 0.53 |
|     | 18 | 267.52 | 80.70 | 52501 | 0.99 | 79  | 136.80 | 1.30 | 0.57 |
| F20 | 0  | 225.75 | 79.00 | 38768 | 0.99 | 183 | 387.70 | 2.30 | 0.82 |
|     | 9  | 282.29 | 80.10 | 55371 | 0.99 | 129 | 294.00 | 2.00 | 0.78 |
|     | 18 | 253.12 | 81.20 | 50023 | 0.99 | 84  | 184.50 | 1.70 | 0.71 |

**Supplementary Table 8S.** Identification and frequency of yeasts isolated into pure culture in coffee mucilage during the fermentation process at three different times in the 20 studied farms.

| Microorganism          | Time | Farms |    |    |    |    |    |    |    |    |     |     |     |     |     |     |     |     |     |     |     | Frequency by farms |      |
|------------------------|------|-------|----|----|----|----|----|----|----|----|-----|-----|-----|-----|-----|-----|-----|-----|-----|-----|-----|--------------------|------|
|                        |      | F1    | F2 | F3 | F4 | F5 | F6 | F7 | F8 | F9 | F10 | F11 | F12 | F13 | F14 | F15 | F16 | F17 | F18 | F19 | F20 | #                  | %    |
| Candida tropicalis     | T1   | ■     |    |    |    |    |    | ■  |    |    |     | ■   | ■   | ■   |     | ■   | ■   | ■   | ■   |     |     | 9                  | 45.0 |
|                        | T2   | ■     |    |    |    |    |    | ■  |    |    |     | ■   | ■   | ■   |     | ■   | ■   | ■   | ■   |     |     |                    |      |
|                        | T3   |       |    |    |    |    |    |    |    |    |     |     | ■   | ■   | ■   |     |     |     | ■   |     |     |                    |      |
| Candida rugosa         | T1   | ■     |    |    |    |    |    |    | ■  | ■  | ■   |     |     |     |     |     |     |     | ■   | ■   |     | 6                  | 30.0 |
|                        | T2   |       |    |    |    |    |    |    | ■  | ■  | ■   |     |     |     |     |     |     | ■   | ■   | ■   |     |                    |      |
|                        | T3   |       |    |    |    |    |    |    |    |    |     |     |     |     |     |     |     |     | ■   | ■   |     |                    |      |
| Candida guilliermondii | T1   | ■     | ■  |    |    |    | ■  | ■  | ■  | ■  |     | ■   |     | ■   |     |     |     |     |     |     | ■   | 10                 | 50.0 |
|                        | T2   | ■     | ■  |    |    |    | ■  | ■  |    | ■  | ■   |     | ■   |     |     |     | ■   | ■   |     |     |     |                    |      |
|                        | T3   | ■     | ■  |    |    |    | ■  | ■  | ■  | ■  | ■   |     | ■   | ■   |     |     | ■   | ■   |     |     |     |                    |      |
| Cryptococcus laurentii | T1   | ■     |    |    |    |    |    |    |    |    |     |     |     |     |     |     |     |     |     |     |     | 4                  | 20.0 |
|                        | T2   | ■     |    |    |    |    |    |    |    | ■  | ■   |     |     |     |     |     |     |     |     |     |     |                    |      |
|                        | T3   |       | ■  | ■  |    |    |    |    |    |    |     | ■   | ■   |     |     |     |     |     |     |     |     |                    |      |
| Cryptococcus neoformas | T1   |       |    |    |    |    |    | ■  | ■  |    |     |     |     |     |     | ■   |     |     |     |     |     | 6                  | 30.0 |
|                        | T2   | ■     | ■  |    |    |    |    | ■  | ■  | ■  |     | ■   |     |     |     |     |     |     |     |     |     |                    |      |
|                        | T3   |       |    |    |    |    |    |    |    |    |     |     |     |     |     | ■   | ■   |     |     |     |     |                    |      |
| Hanseniaspora          | T1   |       |    | ■  | ■  |    |    | ■  | ■  | ■  | ■   |     |     | ■   | ■   | ■   | ■   | ■   | ■   | ■   |     | 15                 | 75.0 |
|                        | T2   |       |    |    |    | ■  |    | ■  | ■  | ■  | ■   |     |     | ■   | ■   | ■   | ■   | ■   | ■   | ■   |     |                    |      |

|                                 |    |                                                                                      |    |      |
|---------------------------------|----|--------------------------------------------------------------------------------------|----|------|
|                                 | T3 |    |    |      |
| <i>Candida albicans</i>         | T1 |    |    |      |
|                                 | T2 |    | 11 | 55.0 |
|                                 | T3 |    |    |      |
| <i>Candida kefyr</i>            | T1 |    |    |      |
|                                 | T2 |    | 8  | 40.0 |
|                                 | T3 |    |    |      |
| <i>Candida dubliniensis</i>     | T1 |    |    |      |
|                                 | T2 |    | 1  | 5.0  |
|                                 | T3 |    |    |      |
| <i>Candida parapsilosis</i>     | T1 |    |    |      |
|                                 | T2 |    | 3  | 15.0 |
|                                 | T3 |    |    |      |
| <i>Candida lipolytica</i>       | T1 |    |    |      |
|                                 | T2 |    | 2  | 10.0 |
|                                 | T3 |    |    |      |
| <i>Candida kruesi</i>           | T1 |    |    |      |
|                                 | T2 |    | 10 | 50.0 |
|                                 | T3 |    |    |      |
| <i>Rhodotorula glutinitis</i>   | T1 |    |    |      |
|                                 | T2 |    | 2  | 10.0 |
|                                 | T3 |    |    |      |
| <i>Candida zeylanoides</i>      | T1 |    |    |      |
|                                 | T2 |    | 1  | 5.0  |
|                                 | T3 |   |    |      |
| <i>Rhodoturalla spp</i>         | T1 |  |    |      |
|                                 | T2 |  | 3  | 15.0 |
|                                 | T3 |  |    |      |
| <i>Rhodoturalla mucilaginos</i> | T1 |  |    |      |
|                                 | T2 |  | 3  | 15.0 |
|                                 | T3 |  |    |      |
| <i>Saccharomyces cerevisiae</i> | T1 |  |    |      |
|                                 | T2 |  | 1  | 5.0  |
|                                 | T3 |  |    |      |
| <i>Pichia guillermondii</i>     | T1 |  |    |      |
|                                 | T2 |  | 1  | 5.0  |
|                                 | T3 |  |    |      |
| <i>Pichia sp</i>                | T1 |  |    |      |
|                                 | T2 |  | 2  | 10.0 |
|                                 | T3 |  |    |      |
| <i>Candida glabrata</i>         | T1 |  |    |      |
|                                 | T2 |  | 1  | 5.0  |
|                                 | T3 |  |    |      |

T1 (zero hours of fermentation). T2 (middle of the fermentation time). T3 (end of the fermentation time).

**Supplementary Table S9.** Identification and frequency of mycelial fungi isolated into pure culture in coffee mucilage during the fermentation process at three different times in the 20 studied farms.

[illegible]



|                            |    |                                                                                   |                                                                                   |                                                                                     |   |      |
|----------------------------|----|-----------------------------------------------------------------------------------|-----------------------------------------------------------------------------------|-------------------------------------------------------------------------------------|---|------|
| <i>Rhizopus spp</i>        | T1 |  |  |  | 5 | 25.0 |
|                            | T2 |                                                                                   |                                                                                   |                                                                                     |   |      |
|                            | T3 |                                                                                   |                                                                                   |                                                                                     |   |      |
| <i>Scopulariopsis spp</i>  | T1 |                                                                                   |                                                                                   |    | 1 | 5.0  |
|                            | T2 |                                                                                   |                                                                                   |                                                                                     |   |      |
|                            | T3 |                                                                                   |                                                                                   |                                                                                     |   |      |
| <i>Sporotrichum spp</i>    | T1 |                                                                                   |                                                                                   |                                                                                     | 1 | 5.0  |
|                            | T2 |                                                                                   |                                                                                   |  |   |      |
|                            | T3 |                                                                                   |                                                                                   |                                                                                     |   |      |
| <i>Syncephalastrum spp</i> | T1 |                                                                                   |                                                                                   |  | 1 | 5.0  |
|                            | T2 |                                                                                   |                                                                                   |                                                                                     |   |      |
|                            | T3 |                                                                                   |                                                                                   |                                                                                     |   |      |
| <i>Trichoderma spp</i>     | T1 |                                                                                   |  |    | 2 | 10.0 |
|                            | T2 |                                                                                   |                                                                                   |                                                                                     |   |      |
|                            | T3 |                                                                                   |                                                                                   |                                                                                     |   |      |

T1 (zero hours of fermentation). T2 (middle of the fermentation time). T3 (end of the fermentation time).

**Supplementary Table S10.** Total SCA score and sensory descriptors in farms from the department of Cesar.

| Farm | Fermentation<br>Time (h) | Humidity (%) | Clean<br>cup | Total<br>SCA<br>Score | Sensory Description                                                                   |
|------|--------------------------|--------------|--------------|-----------------------|---------------------------------------------------------------------------------------|
| F1   | 0                        | 12.0         | 10.0         | 81.74                 | Herbal, chocolat, brown sugar                                                         |
|      | 18                       | 12.3         | 0.0          | 53.00                 | Ferment                                                                               |
|      | 36                       | 9.9          | 0.0          | 53.63                 | Mold                                                                                  |
| F2   | 0                        | 8.6          | 10.0         | 82.38                 | Brown sugar, nuts, cereal                                                             |
|      | 18                       | 8.7          | 10.0         | 83.13                 | Chocolat, brown sugar, citrus floral, herbal                                          |
|      | 36                       | 8.8          | 10.0         | 84.25                 | Apple, fruity, honey.                                                                 |
| F3   | 0                        | 9.1          | 10.0         | 82.74                 | Nuts, cereal, citrus, vanilla. Fine acidity light body                                |
|      | 10                       | 9.0          | 10.0         | 84.00                 | Positive herbal, black Tea, blackberries, brown sugar.<br>Fine acidity. Juicy body    |
|      | 20                       | 10.2         | 10.0         | 81.78                 | Cinnamon, caramel. Medium acidity. Low body. Dry<br>residual.                         |
| F4   | 0                        | 11.8         | 10.0         | 80.50                 | Brown sugar, cereal. Dry residual. Light body                                         |
|      | 9                        | 11.3         | 10.0         | 83.00                 | Cereal, pea, citrus, honey, caramel. Skinny body.<br>Medium fine acidity              |
|      | 18                       | 12.1         | 10.0         | 83.25                 | Fruity, herbal, citrus, brown sugar, honey. Delicate<br>acidity. Juicy body. Balanced |
| F5   | 0                        | 9.1          | 10.0         | 83.00                 | Brown sugar, caramel, citrus, chocolate                                               |
|      | 9                        | 10.1         | 10.0         | 82.74                 | Nuts, cereal, citrus, vanilla. Fine acidity. Light body                               |
|      | 18                       | 10.1         | 10.0         | 82.49                 | Brown sugar, caramel.                                                                 |
| F6   | 0                        | 9.5          | 10.0         | 85.27                 | Floral, fruity, red fruits, cherry. Bright acidity. Smooth<br>body                    |
|      | 21                       | 10.5         | 10.0         | 84.64                 | Fruity flavor, red fruits, apple. Bright acidity. Creamy<br>body                      |
|      | 42                       | 9.5          | 10.0         | 83.74                 | Caramel, blackberries, cherry. Clean residual. Low<br>acidity. Light body             |
| F7   | 0                        | 11.2         | 10.0         | 81.50                 | Herbal, brown sugar, citrus                                                           |
|      | 18                       | 11.3         | 10.0         | 81.50                 | Citrus, red fruits, honey, acidity, astringent, flat cup                              |

|     |    |      |      |       |                                                                                                       |
|-----|----|------|------|-------|-------------------------------------------------------------------------------------------------------|
|     | 36 | 11.1 | 10.0 | 84.00 | Red fruits, blackberries, fruity, caramel, citrus, brown sugar. Dry residual. Balanced and clean body |
|     | 0  | 9.8  | 10.0 | 81.75 | Sweet, straw, citrus                                                                                  |
| F8  | 9  | 10.6 | 10.0 | 83.13 | Citrus, floral, jasmine, chocolat, caramel, walnut.<br>Acidity and medium body                        |
|     | 18 | 10.4 | 10.0 | 83.63 | Caramel, citrus, brown sugar, honey. Balanced body                                                    |
|     | 0  | 11.3 | 10.0 | 80.88 | Herbal, nuts                                                                                          |
| F9  | 9  | 11.4 | 10.0 | 81.50 | Brown sugar, chocolat, cereal, flat cup                                                               |
|     | 18 | 11.5 | 10.0 | 81.50 | Herbal, brown sugar, dry. Low acidity, cereal                                                         |
|     | 0  | 11.2 | 10.0 | 82.50 | Chocolate, brown sugar, caramel, citrus                                                               |
| F10 | 9  | 11.5 | 10.0 | 82.25 | Brown sugar, chocolat                                                                                 |
|     | 18 | 11.3 | 10.0 | 82.13 | Citrus, caramel, brown sugar, honey                                                                   |
|     | 0  | 11.4 | 10.0 | 81.50 | Herbal, brown sugar, citrus                                                                           |
| F11 | 18 | 11.2 | 10.0 | 81.50 | Citrus, brown sugar, caramel                                                                          |
|     | 36 | 10.7 | 10.0 | 83.00 | Vanilla, citrus, herbal, cane. Fine acidity. Residual straw                                           |
|     | 0  | 10.3 | 10.0 | 81.50 | Herbal, honey                                                                                         |
| F12 | 7  | 10.4 | 10.0 | 82.75 | Caramel, citrus, brown sugar, species. Residual cereal                                                |
|     | 14 | 11.4 | 10.0 | 81.63 | Herbal, cereal. Low acidity. Medium and light body                                                    |
|     | 0  | 9.8  | 10.0 | 83.00 | Caramel, brown sugar, citric, fruity, blackberries                                                    |
| F13 | 8  | 10.2 | 10.0 | 82.75 | Brown sugar, red fruits, citrus                                                                       |
|     | 16 | 11.0 | 10.0 | 83.63 | Brown sugar, citric, chocolate, spicy                                                                 |
|     | 0  | 9.8  | 10.0 | 81.88 | Citrus, herbal, caramel, cereal                                                                       |
| F14 | 5  | 10.2 | 10.0 | 82.00 | Herbal, brown sugar, citrus                                                                           |
|     | 10 | 10.0 | 10.0 | 81.75 | Herbal, citrus, brown sugar. Dry and rough residual                                                   |
|     | 0  | 9.0  | 10.0 | 82.75 | Citrus, caramel, fruit, brown sugar                                                                   |
| F15 | 8  | 10.6 | 10.0 | 83.25 | Caramel, floral, citrus, floral                                                                       |
|     | 16 | 10.6 | 10.0 | 83.50 | Citrus, floral, caramel                                                                               |
|     | 0  | 10.6 | 10.0 | 83.50 | Caramel, chocolat, brown sugar, honey, floral, rose, tea. Consistent balance                          |
| F16 | 7  | 10.2 | 10.0 | 82.50 | Citrus, brown sugar, herbal, nuts, honey. Low acidity.                                                |
|     | 14 | 10.1 | 10.0 | 82.50 | Nuts, herbal, cereal fragrance, citrus, medium herbal background. Light body                          |
| F17 | 0  | 10.7 | 10.0 | 83.63 | Brown sugar, citrus, honey                                                                            |

|     |    |      |      |       |                                                                                                |
|-----|----|------|------|-------|------------------------------------------------------------------------------------------------|
|     | 8  | 9.7  | 10.0 | 83.00 | Chocolat, caramel, brown sugar, nuts. Clean residual.<br>Medium acidity                        |
|     | 16 | 10.1 | 10.0 | 82.13 | Yellow fruits, citrus, caramel, fruit flavor. Dry residual                                     |
|     | 0  | 11.2 | 10.0 | 81.13 | Caramel, chocolat, nuts                                                                        |
| F18 | 9  | 11.0 | 10.0 | 82.38 | Nuts, herbal, brown sugar, citric. Acidity and medium<br>body                                  |
|     | 18 | 10.7 | 10.0 | 82.13 | Citrus, caramel, herbal, flat cup, cereal. Dry residual                                        |
|     | 0  | 11.6 | 10.0 | 85.13 | Caramel, citrus, spicy, balanced, clean residual, fruity,<br>grapes, cane. Juicy body          |
| F19 | 9  | 11.6 | 10.0 | 83.13 | Citrus, orange, brown sugar, yellow fruits, residual<br>straw-cereal. Fine acidity. Juicy body |
|     | 18 | 11.8 | 10.0 | 83.13 | Citrus, caramel, brown sugar. Medium acidity. Dry and<br>cereals residual.                     |
|     | 0  | 11.2 | 10.0 | 83.13 | Citrus, brown sugar, caramel                                                                   |
| F20 | 9  | 12.1 | 0.00 | 52.00 | Contaminated                                                                                   |
|     | 18 | 10.7 | 10.0 | 82.75 | Red fruits, citrus, orange, chocolate. Dry residual.<br>Acidity and body medium.               |

\*Total SCA score: 90-100 Outstanding, 85.0-89.99 Excellent, 80-84.99 Very Good, <80 Commercial Coffee.
